# Supplementary material for: Association between early viral LRTI and subsequent wheezing development, a meta-analysis and sensitivity analyses for studies comparable for confounding factors
Source: PubMed Central journal article supplement (PMC8049235; doi:10.1371/journal.pone.0249831), 2021-04-15

S1 Fig. Funnel plot for publication for wheezing in children with and without LRTI in infancy

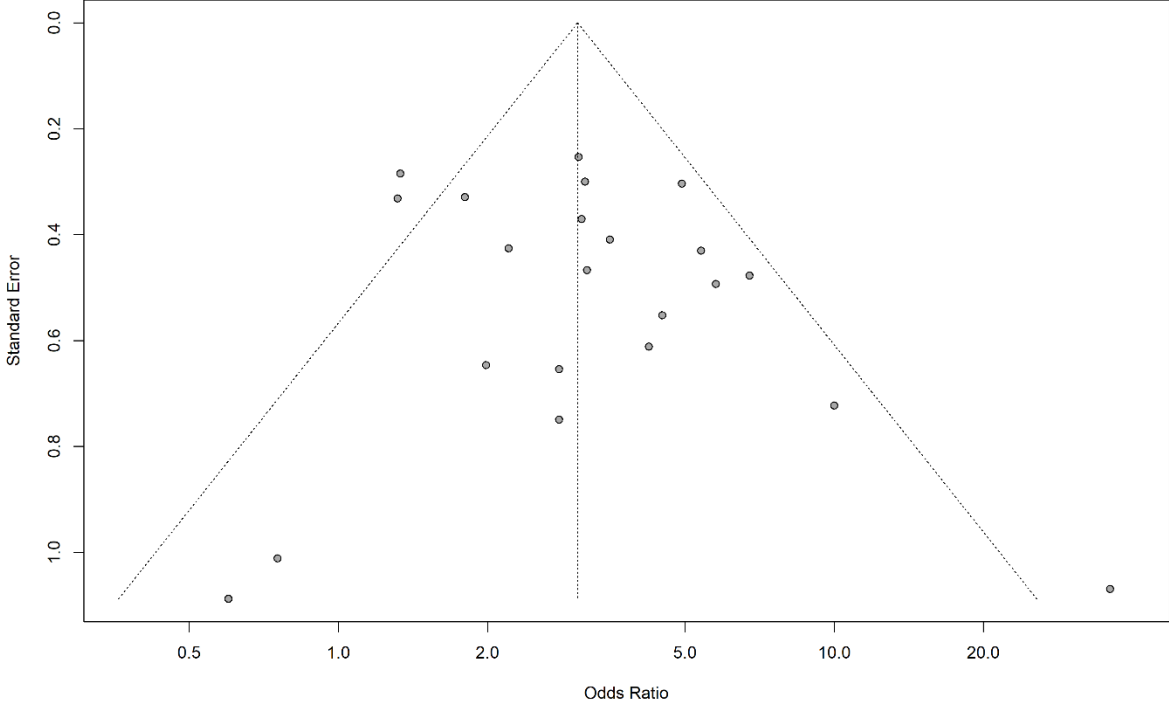

Supplement: pone.0249831.s001.pdf [file pone.0249831.s001.pdf]
