# Supplementary material for: Association between early viral LRTI and subsequent wheezing development, a meta-analysis and sensitivity analyses for studies comparable for confounding factors
Source: PubMed Central journal article supplement (PMC8049235; doi:10.1371/journal.pone.0249831), 2021-04-15
Supplement: pone.0249831.s004.pdf [file pone.0249831.s004.pdf]

S3 Table. Items for risk of bias assessment

| <b>Newcastle – Ottawa Scale for case cohort studies</b>                                                     | <b>One star (1)/ No star (0)</b> |
|-------------------------------------------------------------------------------------------------------------|----------------------------------|
| <b>Selection</b>                                                                                            |                                  |
| 1) Representativeness of the LRTI cohort                                                                    | <b>1</b>                         |
| 2) Selection of the non LRTI cohort                                                                         | <b>1</b>                         |
| 3) Ascertainment of LRTI exposition                                                                         | <b>1</b>                         |
| 4) Demonstration that wheezing was not present at start of study                                            | <b>1</b>                         |
| <b>Comparability</b>                                                                                        |                                  |
| 1) Comparability of cohorts on the basis of the design or analysis                                          | <b>2</b>                         |
| <b>Outcome</b>                                                                                              |                                  |
| 1) Assessment of wheezing                                                                                   | <b>1</b>                         |
| 2) Was follow-up long enough for outcomes to occur                                                          | <b>1</b>                         |
| 3) Adequacy of follow up of cohorts                                                                         | <b>1</b>                         |
| Total score                                                                                                 | <b>9</b>                         |
| <b>Interpretation of the two risk of bias tools</b>                                                         |                                  |
| <ul style="list-style-type: none"> <li>• 6-9: Low risk of bias</li> <li>• 0-5: High risk of bias</li> </ul> |                                  |
