# Supplementary material for: Association between early viral LRTI and subsequent wheezing development, a meta-analysis and sensitivity analyses for studies comparable for confounding factors
Source: PubMed Central journal article supplement (PMC8049235; doi:10.1371/journal.pone.0249831), 2021-04-15
Supplement: pone.0249831.s005.pdf [file pone.0249831.s005.pdf]

S4 Table. Main reasons of exclusion of eligible studies

| N° | Author, Date            | Title                                                                                                                                                                        | Reason of exclusion                        |
|----|-------------------------|------------------------------------------------------------------------------------------------------------------------------------------------------------------------------|--------------------------------------------|
| 1  | Al-Shawwa, 2006         | Respiratory syncytial virus bronchiolitis and risk of subsequent wheezing: a matter of severity                                                                              | No LRTI - group                            |
| 2  | Bacherier, 2012         | Determinants of asthma after severe respiratory syncytial virus bronchiolitis.                                                                                               | No LRTI - group                            |
| 3  | Backman, 2018           | Asthma and lung function in adulthood after a viral wheezing episode in early childhood.                                                                                     | No LRTI + group                            |
| 4  | Balekian, 2017          | Cohort Study of Severe Bronchiolitis during Infancy and Risk of Asthma by Age 5 Years.                                                                                       | No LRTI - group                            |
| 5  | Bergroth, 2016          | Post-bronchiolitis use of asthma medication: a prospective 1-year follow-up study                                                                                            | No LRTI - group                            |
| 6  | Bergroth, 2020          | Rhinovirus Type in Severe Bronchiolitis and the Development of Asthma.                                                                                                       | No LRTI + group                            |
| 7  | Blanken, 2013           | Respiratory Syncytial Virus and Recurrent Wheeze in Healthy Preterm Infants.                                                                                                 | No LRTI - group                            |
| 8  | Bochkov, 2020           | A 14-year Prospective Study of Human Coronavirus Infections in Hospitalized Children: Comparison With Other Respiratory Viruses.                                             | No LRTI - group                            |
| 9  | Bonnelykke, 2015        | Association between respiratory infections in early life and later asthma is independent of virus type.                                                                      | No LRTI - group                            |
| 10 | Bont, 2000              | Long-term consequences of respiratory syncytial virus (RSV) bronchiolitis.                                                                                                   | Review                                     |
| 11 | Bont, 2004              | Seasonality of long term wheezing following respiratory syncytial virus lower respiratory tract infection.                                                                   | No LRTI - group                            |
| 12 | Bosis, 2008             | Role of respiratory pathogens in infants hospitalized for a first episode of wheezing and their impact on recurrences                                                        | No LRTI + group                            |
| 13 | Bradley, 2005           | Severity of respiratory syncytial virus bronchiolitis is affected by cigarette smoke exposure and atopy.                                                                     | No LRTI + group                            |
| 14 | Carbonell-Estrany, 2015 | Long-term burden and respiratory effects of respiratory syncytial virus hospitalization in preterm infants - the SPRING study                                                | Only children with comorbidities recruited |
| 15 | Carlsen, 2020           | Azithromycin administered for acute bronchiolitis may have a protective effect on subsequent wheezing.                                                                       | No LRTI - group                            |
| 16 | Chung, 2002             | RANTES may be predictive of later recurrent wheezing after respiratory syncytial virus bronchiolitis in infants.                                                             | No data on outcomes                        |
| 17 | Cifuentes, 2003         | Risk factors for recurrent wheezing following acute bronchiolitis: a 12-month follow-up.                                                                                     | No LRTI - group                            |
| 18 | Coverstone, 2018        | Recurrent wheezing in children following human metapneumovirus infection.                                                                                                    | Not possible to collect data of interest   |
| 19 | Del Rosal, 2016         | Recurrent wheezing and asthma after bocavirus bronchiolitis.                                                                                                                 | No LRTI - group                            |
| 20 | Ding, 2019              | Comparison of clinical features of acute lower respiratory tract infections in infants with RSV/HRV infection, and incidences of subsequent wheezing or asthma in childhood. | No LRTI - group                            |
| 21 | Dumas, 2019             | Severe bronchiolitis profiles and risk of recurrent wheeze by age 3 years.                                                                                                   | No LRTI - group                            |
| 22 | Ericksson, 2000         | Wheezing following lower respiratory tract infections with respiratory syncytial virus and influenza A in infancy.                                                           | No LRTI - group                            |
| 23 | Ermers, 2011            | IL-13 genetic polymorphism identifies children with late wheezing after respiratory syncytial virus infection.                                                               | No LRTI - group                            |
| 24 | Ermes, 2011             | IL10 family member genes IL19 and IL20 are associated with recurrent wheeze after respiratory syncytial virus bronchiolitis.                                                 | No LRTI - group                            |

| <b>N°</b> | <b>Author, Date</b>      | <b>Title</b>                                                                                                                                                  | <b>Reason of exclusion</b>                 |
|-----------|--------------------------|---------------------------------------------------------------------------------------------------------------------------------------------------------------|--------------------------------------------|
| 25        | Escobar, 2013            | Persistent recurring wheezing in the fifth year of life after laboratory-confirmed, medically attended respiratory syncytial virus infection in infancy.      | No LRTI - group                            |
| 26        | Everard, 2006            | The relationship between respiratory syncytial virus infections and the development of wheezing and asthma in children.                                       | Review                                     |
| 27        | Fauroux, 2014            | Respiratory morbidity of preterm infants of less than 33 weeks gestation without bronchopulmonary dysplasia: a 12-month follow-up of the CASTOR study cohort. | Not viral laboratory confirmed LRTI        |
| 28        | Feyzullah, 2014          | Effects of wheezing in early childhood in the development of allergic rhinitis in later years.                                                                | No LRTI + group                            |
| 29        | Gaffin, 2011             | The effect of prophylactic palivizumab on recurrent wheezing in children with an atopic family history.                                                       | Editorial                                  |
| 30        | Goetghebuer, 2004        | Genetic predisposition to wheeze following respiratory syncytial virus bronchiolitis.                                                                         | No LRTI - group                            |
| 31        | Gómez, 2004              | Respiratory repercussions in adults with a history of infantile bronchiolitis                                                                                 | Not viral laboratory confirmed LRTI        |
| 32        | Guilbert, 2011           | Decreased lung function after preschool wheezing rhinovirus illnesses in children at risk to develop asthma.                                                  | No LRTI - group                            |
| 33        | Hall, 1984               | Long-term prospective study in children after respiratory syncytial virus infection.                                                                          | No data on outcomes                        |
| 34        | Hasegawa, 2019           | Association of Rhinovirus C Bronchiolitis and Immunoglobulin E Sensitization During Infancy With Development of Recurrent Wheeze.                             | No LRTI - group                            |
| 35        | Hyvarinen, 2005          | Teenage asthma after severe early childhood wheezing: An 11-year prospective follow-up.                                                                       | No LRTI - group                            |
| 36        | Hyvärinen, 2005          | Teenage asthma after severe infantile bronchiolitis or pneumonia.                                                                                             | No data on outcomes                        |
| 37        | Illi, 2001               | Early childhood infectious diseases and the development of asthma up to school age: a birth cohort study.                                                     | No LRTI - group                            |
| 38        | Jackson, 2008            | Wheezing rhinovirus illnesses in early life predict asthma development in high-risk children.                                                                 | Not possible to collect data of interest   |
| 39        | Jain, 1974               | Acute bronchiolitis and subsequent wheezing.                                                                                                                  | No abstract and full text available        |
| 40        | Jedrychowski, 2010       | Early wheezing phenotypes and cognitive development of 3-yr-olds. Community-recruited birth cohort study.                                                     | No LRTI + group                            |
| 41        | Karaman, 2011            | Recurrence of wheezing episodes in children with respiratory syncytial virus and non-respiratory syncytial virus bronchiolitis                                | No LRTI - group                            |
| 42        | Koponen, 2012            | Preschool asthma after bronchiolitis in infancy.                                                                                                              | No LRTI - group                            |
| 43        | Korppi, 2004             | Respiratory morbidity 20 years after RSV infection in infancy                                                                                                 | No data on outcomes                        |
| 44        | Korppi, 2017             | IL-10 gene polymorphism is associated with preschool atopy and early-life recurrent wheezing after bronchiolitis in infancy.                                  | No LRTI - group                            |
| 45        | Korsten, 2019            | RSV hospitalization in infancy increases the risk of current wheeze at age 6 in late preterm born children without atopic predisposition.                     | Only children with comorbidities recruited |
| 46        | Kotaniemi-syrjänen, 2002 | Wheezing requiring hospitalization in early childhood: Predictive factors for asthma in a six-year follow-up.                                                 | No data on outcomes                        |
| 47        | Kotaniemi-syrjänen, 2005 | Respiratory syncytial virus infection in children hospitalized for wheezing: Virus-specific studies from infancy to preschool years.                          | No data on outcomes                        |

| <b>N°</b> | <b>Author, Date</b> | <b>Title</b>                                                                                                                                                                    | <b>Reason of exclusion</b>               |
|-----------|---------------------|---------------------------------------------------------------------------------------------------------------------------------------------------------------------------------|------------------------------------------|
| 48        | Kusel, 2007         | Early-life respiratory viral infections, atopic sensitization, and risk of subsequent development of persistent asthma.                                                         | No LRTI - group                          |
| 49        | Lee, 2007           | Relationship of early childhood viral exposures to respiratory symptoms, onset of possible asthma and atopy in high risk children: The Canadian asthma primary prevention study | No LRTI - group                          |
| 50        | Lemanske, 2005      | Rhinovirus illnesses during infancy predict subsequent childhood wheezing.                                                                                                      | Not possible to collect data of interest |
| 51        | Lin, 2001           | Risk factors of wheeze and allergy after lower respiratory tract infections during early childhood.                                                                             | No abstract and full text available      |
| 52        | Liu, 2020           | Association between respiratory syncytial virus hospitalization in infancy and childhood asthma.                                                                                | No data on outcomes                      |
| 53        | Lu, 2016            | Predictors of asthma following severe respiratory syncytial virus (RSV) bronchiolitis in early childhood.                                                                       | No LRTI - group                          |
| 54        | Lukkarinen, 2017    | Rhinovirus-induced first wheezing episode predicts atopic but not nonatopic asthma at school age                                                                                | No LRTI - group                          |
| 55        | Mansbach, 2020      | Detection of respiratory syncytial virus or rhinovirus weeks after hospitalization for bronchiolitis and the risk of recurrent wheezing.                                        | No LRTI - group                          |
| 56        | Marlow, 2019        | Assessing the association between bronchiolitis in infancy and recurrent wheeze: a whole English birth cohort case-control study.                                               | Not viral laboratory confirmed LRTI      |
| 57        | Martinez, 1998      | Differential immune responses to acute lower respiratory illness in early life and subsequent development of persistent wheezing and asthma.                                    | No LRTI - group                          |
| 58        | McConnochie, 1984   | Bronchiolitis as a possible cause of wheezing in childhood: new evidence                                                                                                        | Not viral laboratory confirmed LRTI      |
| 59        | McConnochie, 1985   | Predicting clinically significant lower respiratory tract illness in childhood following mild bronchiolitis                                                                     | Not viral laboratory confirmed LRTI      |
| 60        | McConnochie, 1989   | Wheezing at 8 and 13 years: changing importance of bronchiolitis and passive smoking                                                                                            | Not viral laboratory confirmed LRTI      |
| 61        | Mejias, 2020        | Risk of childhood wheeze and asthma after respiratory syncytial virus infection in full-term infants.                                                                           | No LTRI + group                          |
| 62        | Midulla, 2012       | Rhinovirus bronchiolitis and recurrent wheezing: 1-year follow-up.                                                                                                              | Not viral laboratory confirmed LRTI      |
| 63        | Midulla, 2014       | Recurrent wheezing 36 months after bronchiolitis is associated with rhinovirus infections and blood eosinophilia.                                                               | No LRTI - group                          |
| 64        | Mikalsen, 2012      | The outcome after severe bronchiolitis is related to gender and virus                                                                                                           | No data on outcomes                      |
| 65        | Mok, 1982           | Outcome of acute lower respiratory tract infection in infants: preliminary report of seven-year follow-up study                                                                 | Not viral laboratory confirmed LRTI      |
| 66        | Mok, 1984           | Outcome for acute bronchitis, bronchiolitis, and pneumonia in infancy                                                                                                           | Not viral laboratory confirmed LRTI      |

| <b>N°</b> | <b>Author, Date</b>     | <b>Title</b>                                                                                                                                                      | <b>Reason of exclusion</b>                 |
|-----------|-------------------------|-------------------------------------------------------------------------------------------------------------------------------------------------------------------|--------------------------------------------|
| 67        | Murray, 1992            | Respiratory status and allergy after bronchiolitis                                                                                                                | Not viral laboratory confirmed LRTI        |
| 68        | Narita, 2011            | Relationship between lower respiratory tract infections caused by respiratory syncytial virus and subsequent development of asthma in Japanese children.          | No LRTI - group                            |
| 69        | Nenna, 2015             | Viral Load in Infants Hospitalized for Respiratory Syncytial Virus Bronchiolitis Correlates with Recurrent Wheezing at Thirty-Six-Month Follow-Up.                | No LRTI - group                            |
| 70        | Nicolai, 2017           | Risk Factors for Virus-induced Acute Respiratory Tract Infections in Children Younger Than 3 Years and Recurrent Wheezing at 36 Months Follow-Up After Discharge. | No LRTI - group                            |
| 71        | Noble, 1997             | Respiratory status and allergy nine to 10 years after acute bronchiolitis                                                                                         | Not viral laboratory confirmed LRTI        |
| 72        | O'Callaghan-Gordo, 2013 | Lower respiratory tract infections associated with rhinovirus during infancy and increased risk of wheezing during childhood. A cohort study.                     | No LRTI - group                            |
| 73        | Oymar, 2001             | Eosinophil counts and urinary eosinophil protein X in children hospitalized for wheezing during the first year of life: prediction of recurrent wheezing.         | No LRTI - group                            |
| 74        | Palmer, 2011            | Respiratory outcomes, utilization and costs 12 months following a respiratory syncytial virus diagnosis among commercially insured late-preterm infants           | Only children with comorbidities recruited |
| 75        | Panitch, 2007           | The relationship between early respiratory viral infections and subsequent wheezing and asthma.                                                                   | Review                                     |
| 76        | Petrarca, 2018          | Acute bronchiolitis: Influence of viral co-infection in infants hospitalized over 12 consecutive epidemic seasons.                                                | No LRTI - group                            |
| 77        | Pifferi, 2001           | Eosinophil cationic protein in infants with respiratory syncytial virus bronchiolitis: predictive value for subsequent development of persistent wheezing.        | No LRTI - group                            |
| 78        | Piippo-Savolainen, 2004 | Asthma and Lung Function 20 Years After Wheezing in Infancy: Results From a Prospective Follow-up Study                                                           | Not viral laboratory confirmed LRTI        |
| 79        | Piippo-Savolainen, 2006 | Early predictors for adult asthma and lung function abnormalities in infants hospitalized for bronchiolitis: A prospective 18-to 20-year follow-up.               | No LRTI - group                            |
| 80        | Piippo-Savolainen, 2007 | Adult asthma after non-respiratory syncytial virus bronchiolitis in infancy: Subgroup analysis of the 20-year prospective follow-up study.                        | No LRTI - group                            |
| 81        | Piippo-Savolainen, 2007 | Does blood eosinophilia in wheezing infants predict later asthma? A prospective 18-20-year follow-up.                                                             | No LRTI - group                            |
| 82        | Ramilo, 2018            | Respiratory Syncytial Virus-induced Acute Disease Severity and Long-Term Wheezing Uncovering the Unexpected.                                                      | Editorial                                  |
| 83        | Ramsey, 2007            | Respiratory illnesses in early life and asthma and atopy in childhood.                                                                                            | No LRTI - group                            |
| 84        | Reijonen, 2000          | Predictors of asthma three years after hospital admission for wheezing in infancy.                                                                                | No LRTI - group                            |
| 85        | Rinawi, 2017            | Bronchiolitis in young infants: is it a risk factor for recurrent wheezing in childhood?                                                                          | Not viral laboratory confirmed LRTI        |

| <b>N°</b> | <b>Author, Date</b> | <b>Title</b>                                                                                                                                                                      | <b>Reason of exclusion</b>                 |
|-----------|---------------------|-----------------------------------------------------------------------------------------------------------------------------------------------------------------------------------|--------------------------------------------|
| 86        | Romero, 2010        | Serious early childhood wheezing after respiratory syncytial virus lower respiratory tract illness in preterm infants                                                             | Only children with comorbidities recruited |
| 87        | Rubner, 2017        | Early life rhinovirus wheezing, allergic sensitization, and asthma risk at adolescence.                                                                                           | No LRTI - group                            |
| 88        | Ruotsalainen, 2010  | Adulthood asthma after wheezing in infancy: a questionnaire study at 27 years of age                                                                                              | Not viral laboratory confirmed LRTI        |
| 89        | Ruotsalainen, 2013  | Adolescent asthma after rhinovirus and respiratory syncytial virus bronchiolitis                                                                                                  | Not viral laboratory confirmed LRTI        |
| 90        | Ruotsalainen, 2013  | No association between overweight and asthma or allergy in adolescence after wheezing in infancy                                                                                  | Not viral laboratory confirmed LRTI        |
| 91        | Santos, 2011        | Pneumonia in the first 2 years of life, and asthma in preschool-age children.                                                                                                     | Not viral laboratory confirmed LRTI        |
| 92        | Schauer, 2002       | RSV bronchiolitis and risk of wheeze and allergic sensitisation in the first year of life.                                                                                        | Follow up duration < 1 year                |
| 93        | Sigurs, 1994        | Eosinophil cationic protein in nasal secretion and in serum and myeloperoxidase in serum in respiratory syncytial virus bronchiolitis: relation to asthma and atopy               | No LRTI - group                            |
| 94        | Sigurs, 2004        | Does bronchiolitis caused by RSV predispose to atopic asthma?                                                                                                                     | Review                                     |
| 95        | Sigurs, 2007        | Respiratory Syncytial Virus lower respiratory tract illness in infancy and subsequent morbidity.                                                                                  | Comment on an article                      |
| 96        | Simões, 2010        | The effect of respiratory syncytial virus on subsequent recurrent wheezing in atopic and nonatopic children.                                                                      | Only children with comorbidities recruited |
| 97        | Sims, 1981          | Atopy does not predispose to RSV bronchiolitis or postbronchiolitic wheezing.                                                                                                     | No LRTI - group                            |
| 98        | Skirrow, 2019       | Preschool respiratory hospital admissions following infant bronchiolitis: a birth cohort study.                                                                                   | No data on outcomes                        |
| 99        | Sly, 1989           | Childhood asthma following hospitalisation with acute viral bronchiolitis in infancy                                                                                              | No LRTI - group                            |
| 100       | Stein, 1999         | Respiratory syncytial virus in early life and risk of wheeze and allergy by age 13 years.                                                                                         | Not possible to collect data of interest   |
| 101       | Stein, 2009         | Long-term airway morbidity following viral LRTI in early infancy: recurrent wheezing or asthma?                                                                                   | Review                                     |
| 102       | Stensballe, 2009    | The causal direction in the association between respiratory syncytial virus hospitalization and asthma.                                                                           | No data on outcomes                        |
| 103       | Szabo, 2014         | A Population-Based Study of Childhood Respiratory Morbidity after Severe Lower Respiratory Tract Infections in Early Childhood.                                                   | No data on outcomes                        |
| 104       | Takeyama, 2014      | Clinical and epidemiologic factors related to subsequent wheezing after virus-induced lower respiratory tract infections in hospitalized pediatric patients younger than 3 years. | No LRTI - group                            |

| <b>N°</b> | <b>Author, Date</b>    | <b>Title</b>                                                                                                                                           | <b>Reason of exclusion</b>               |
|-----------|------------------------|--------------------------------------------------------------------------------------------------------------------------------------------------------|------------------------------------------|
| 105       | Teeratakulpisarn, 2014 | Rhinovirus infection in children hospitalized with acute bronchiolitis and its impact on subsequent wheezing or asthma: a comparison of etiologies.    | No LRTI - group                          |
| 106       | Tian, 2009             | [The correlation factor about respiratory syncytial virus bronchiolitis and post-bronchiolitis wheezing in infant].                                    | No LRTI - group                          |
| 107       | Toivonen, 2019         | Acute respiratory infections in early childhood and risk of asthma at age 7 years.                                                                     | No LRTI - group                          |
| 108       | Törmänen, 2018         | Risk factors for asthma after infant bronchiolitis                                                                                                     | Not viral laboratory confirmed LRTI      |
| 109       | Turner, 2002           | Reduced lung function both before bronchiolitis and at 11 years                                                                                        | Not viral laboratory confirmed LRTI      |
| 110       | Turunen, 2017          | Clinical and Virus Surveillance After the First Wheezing Episode Special Reference to Rhinovirus A and C Species.                                      | No LRTI - group                          |
| 111       | Valkonen, 2009         | Recurrent wheezing after respiratory syncytial virus or non-respiratory syncytial virus bronchiolitis in infancy: a 3-year follow-up.                  | No LRTI - group                          |
| 112       | van der Sande, 2002    | Severe respiratory syncytial virus infection in early life is associated with increased type 2 cytokine production in Gambian children.                | Not possible to collect data of interest |
| 113       | van Meel, 2018         | A population-based prospective cohort study examining the influence of early-life respiratory tract infections on school-age lung function and asthma. | No LRTI - group                          |
| 114       | van Meel, 2020         | Airway bacterial carriage and childhood respiratory health: A population-based prospective cohort study.                                               | Not viral laboratory confirmed LRTI      |
| 115       | Weber, 1999            | Respiratory illness after severe respiratory syncytial virus disease in infancy in The Gambia.                                                         | Not possible to collect data of interest |
| 116       | Welliver, 1986         | Predictive value of respiratory syncytial virus-specific IgE responses for recurrent wheezing following bronchiolitis.                                 | No LRTI - group                          |
| 117       | Welliver, 1993         | The relationship of RSV-specific immunoglobulin E antibody responses in infancy, recurrent wheezing, and pulmonary function at age 7-8 years.          | No LRTI - group                          |
| 118       | Wennergren, 1997       | Wheezing bronchitis reinvestigated at the age of 10 years                                                                                              | No LRTI - group                          |
| 119       | Zhang, 2020            | Airway microbiome, host immune response and recurrent wheezing in infants with severe respiratory syncytial virus bronchiolitis.                       | No LRTI - group                          |
| 120       | Zhou, 2016             | Azithromycin therapy during respiratory syncytial virus bronchiolitis: Upper airway microbiome alterations and subsequent recurrent wheeze.            | No LRTI - group                          |
| 121       | Zomer-Kooijker, 2014   | Decreased lung function precedes severe respiratory syncytial virus infection and post-respiratory syncytial virus wheeze in term infants.             | No LRTI - group                          |
