# Supplementary material for: Association between early viral LRTI and subsequent wheezing development, a meta-analysis and sensitivity analyses for studies comparable for confounding factors
Source: PubMed Central journal article supplement (PMC8049235; doi:10.1371/journal.pone.0249831), 2021-04-15
Supplement: pone.0249831.s006.pdf [file pone.0249831.s006.pdf]

S5 Table. Baseline Characteristics of Studies Meeting Inclusion Criteria

| <b>Characteristics</b>               | <b>N = 22</b> | <b>%</b> |
|--------------------------------------|---------------|----------|
| <b>Year of publication</b>           | 1978-2017     |          |
| <b>Period of LRTI</b>                | 1960-2005     |          |
| <b>Follow-up duration (Years)</b>    | 1,5-10        |          |
| <b>Sampling</b>                      |               |          |
| Non probabilistic                    | 21            | 95.5     |
| Probabilistic                        | 1             | 4.6      |
| <b>Timing of exposure collection</b> |               |          |
| Prospectively                        | 18            | 77.3     |
| Retrospectively                      | 4             | 9.1      |
| <b>Country</b>                       |               |          |
| Australia                            | 1             | 4.6      |
| Chile                                | 1             | 4.6      |
| Danemark                             | 2             | 9.1      |
| Danmark                              | 1             | 4.6      |
| England                              | 1             | 4.6      |
| Finland                              | 1             | 4.6      |
| Netherland                           | 1             | 4.6      |
| Norway                               | 1             | 4.6      |
| Qatar                                | 1             | 4.6      |
| Russia                               | 1             | 4.6      |
| Spain                                | 2             | 9.1      |
| Sweden                               | 6             | 27.3     |
| UK                                   | 2             | 9.1      |
| United Kingdom                       | 1             | 4.6      |
| <b>UNSD Region</b>                   |               |          |

| <b>Characteristics</b>          | <b>N = 22</b> | <b>%</b> |
|---------------------------------|---------------|----------|
| Eastern Europe                  | 1             | 4.6      |
| Northern Europe                 | 15            | 68.2     |
| Oceania                         | 1             | 4.6      |
| South America                   | 1             | 4.6      |
| Southern Europe                 | 2             | 9.1      |
| Western Asia                    | 1             | 4.6      |
| Western Europe                  | 1             | 4.6      |
| <b>Country income level</b>     |               |          |
| High-income economies           | 21            | 95.5     |
| Upper-middle-income economies   | 1             | 4.6      |
| <b>Age range at recruitment</b> |               |          |
| < 6 months                      | 5             | 22.7     |
| < 1 year                        | 13            | 59.1     |
| < 2 years                       | 3             | 13.7     |
| Unclear/Not reported            | 1             | 4.6      |
| <b>Age range at interview</b>   |               |          |
| 2-5 years                       | 9             | 40.9     |
| 5-10 years                      | 8             | 36.3     |
| 10-15 years                     | 1             | 4.5      |
| 15-20 years                     | 1             | 4.5      |
| Unclear/Not reported            | 3             | 13.6     |
| <b>Hospitalization LRTI +</b>   |               |          |
| Hospitalized                    | 22            | 100.0    |
| <b>Hospitalization LRTI -</b>   |               |          |
| Ambulatory                      | 8             | 36.4     |
| Hospitalized                    | 7             | 31.8     |

| <b>Characteristics</b>                     | <b>N = 22</b> | <b>%</b> |
|--------------------------------------------|---------------|----------|
| Hospitalized/ambulatory                    | 2             | 9.1      |
| Unclear/Not reported                       | 5             | 22.7     |
| <b>First episode of LRTI</b>               |               |          |
| No                                         | 3             | 13.6     |
| Yes                                        | 15            | 68.2     |
| Unclear/Not reported                       | 4             | 18.2     |
| <b>Virus screened for LRTI +</b>           |               |          |
| Adenovirus type 7                          | 1             | 4.6      |
| Human Metapneumovirus (hMPV)               | 1             | 4.6      |
| Human Respiratory Syncytial Virus (HRSV)   | 20            | 90.9     |
| <b>Sample types</b>                        |               |          |
| Nasopharyngeal                             | 9             | 40.9     |
| Unclear/ Not reported                      | 13            | 59.1     |
| <b>Detection assays</b>                    |               |          |
| Classical RT-PCR                           | 1             | 4.6      |
| Classical RT-PCR, ELISA                    | 2             | 9.1      |
| Culture                                    | 1             | 4.6      |
| Culture, Rapid antigen                     | 1             | 4.6      |
| ELISA, latex agglutination test            | 1             | 4.6      |
| Enzyme immunoassay                         | 3             | 13.6     |
| Immunoassay method                         | 1             | 4.6      |
| Immunoflorescent assay                     | 2             | 9.1      |
| Immunoflorescent assay, enzyme immunoassay | 2             | 9.1      |
| Immunofluorescence, Culture                | 2             | 9.1      |
| Immunofluorescence, RT-PCR                 | 2             | 9.1      |
| Unclear/Not reported                       | 4             | 18.2     |

| <b>Characteristics</b>         | <b>N = 22</b> | <b>%</b> |
|--------------------------------|---------------|----------|
| <b>Type of LRTI</b>            |               |          |
| Bronchiolitis                  | 15            | 68.2     |
| LRTI not specified             | 6             | 27.3     |
| Pneumonia                      | 1             | 4.6      |
| <b>Type of wheezing</b>        |               |          |
| Any wheezing                   | 2             | 9.1      |
| Current wheezing               | 6             | 27.3     |
| Recurrent wheezing             | 13            | 59.1     |
| Wheezing in the last 12 months | 1             | 4.6      |

LRTI: Lower Respiratory Tract Infections; HRSV: Human respiratory syncytial virus; HAdV: Human adenovirus; HMPV: Human metapneumovirus
