# Supplementary material for: Association between early viral LRTI and subsequent wheezing development, a meta-analysis and sensitivity analyses for studies comparable for confounding factors
Source: PubMed Central journal article supplement (PMC8049235; doi:10.1371/journal.pone.0249831), 2021-04-15
Supplement: pone.0249831.s007.pdf [file pone.0249831.s007.pdf]

**S6 Table: Risk of bias assessment**

| Author, Year                  | Representativeness of the LRTI + | Selection of the LRTI - | Ascertainment of LRTI | Demonstration that wheezing was not present at start of study | Comparability of cohorts on the basis of the design or analysis | Assessment of wheezing | Was follow-up long enough for wheezing to occur | Adequacy of follow up of cohorts | Total score | Risk of bias     |
|-------------------------------|----------------------------------|-------------------------|-----------------------|---------------------------------------------------------------|-----------------------------------------------------------------|------------------------|-------------------------------------------------|----------------------------------|-------------|------------------|
| Bertrand, 2015                | 1                                | 1                       | 1                     | 0                                                             | 2                                                               | 1                      | 1                                               | 1                                | 8           | Low risk of bias |
| Fjaerli, 2005                 | 1                                | 1                       | 1                     | 0                                                             | 2                                                               | 1                      | 1                                               | 1                                | 8           | Low risk of bias |
| García-García, 2007, HMPV     | 1                                | 1                       | 1                     | 1                                                             | 0                                                               | 1                      | 1                                               | 1                                | 7           | Low risk of bias |
| García-García, 2007, HRSV     | 1                                | 1                       | 1                     | 1                                                             | 0                                                               | 1                      | 1                                               | 1                                | 7           | Low risk of bias |
| Henderson, 2005, 30–42 months | 1                                | 0                       | 1                     | 1                                                             | 0                                                               | 1                      | 1                                               | 1                                | 6           | Low risk of bias |
| Henderson, 2005, 69–81 months | 1                                | 0                       | 1                     | 1                                                             | 0                                                               | 1                      | 1                                               | 1                                | 6           | Low risk of bias |
| Juntti, 2003                  | 1                                | 1                       | 1                     | 0                                                             | 2                                                               | 1                      | 1                                               | 1                                | 8           | Low risk of bias |
| Kristjánsson, 2006            | 1                                | 0                       | 1                     | 0                                                             | 2                                                               | 0                      | 1                                               | 1                                | 6           | Low risk of bias |
| Osundwa, 1993                 | 1                                | 1                       | 1                     | 0                                                             | 1                                                               | 1                      | 1                                               | 1                                | 7           | Low risk of bias |
| Poorisrisak, 2010             | 1                                | 0                       | 1                     | 1                                                             | 0                                                               | 1                      | 1                                               | 1                                | 6           | Low risk of bias |
| Pullan, 1982                  | 1                                | 0                       | 1                     | 1                                                             | 0                                                               | 1                      | 1                                               | 1                                | 6           | Low risk of bias |
| Sigurs, 1995, 1 year          | 1                                | 1                       | 1                     | 1                                                             | 1                                                               | 1                      | 1                                               | 1                                | 8           | Low risk of bias |
| Sigurs, 1995, 3 years         | 1                                | 1                       | 1                     | 1                                                             | 1                                                               | 1                      | 1                                               | 1                                | 8           | Low risk of bias |
| Sigurs, 2000                  | 1                                | 1                       | 1                     | 1                                                             | 2                                                               | 1                      | 1                                               | 1                                | 9           | Low risk of bias |
| Sigurs, 2005                  | 1                                | 1                       | 1                     | 1                                                             | 2                                                               | 1                      | 1                                               | 1                                | 9           | Low risk of bias |
| Sigurs, 2010                  | 1                                | 1                       | 1                     | 1                                                             | 2                                                               | 1                      | 1                                               | 1                                | 9           | Low risk of bias |
| Sims, 1978                    | 1                                | 1                       | 1                     | 1                                                             | 1                                                               | 1                      | 1                                               | 1                                | 8           | Low risk of bias |
| Singleton, 2003               | 1                                | 1                       | 1                     | 1                                                             | 1                                                               | 1                      | 1                                               | 1                                | 8           | Low risk of bias |
| Sly, 1984                     | 1                                | 1                       | 1                     | 0                                                             | 2                                                               | 1                      | 1                                               | 1                                | 8           | Low risk of bias |
| Stensballe, 2017, 1,5 years   | 1                                | 1                       | 1                     | 1                                                             | 1                                                               | 1                      | 1                                               | 1                                | 8           | Low risk of bias |
| Stensballe, 2017, 5 years     | 1                                | 1                       | 1                     | 1                                                             | 1                                                               | 1                      | 1                                               | 1                                | 8           | Low risk of bias |
| Zomer-Kooijker, 2014          | 1                                | 1                       | 1                     | 1                                                             | 1                                                               | 1                      | 1                                               | 1                                | 8           | Low risk of bias |
