# Supplementary material for: Association between early viral LRTI and subsequent wheezing development, a meta-analysis and sensitivity analyses for studies comparable for confounding factors
Source: PubMed Central journal article supplement (PMC8049235; doi:10.1371/journal.pone.0249831), 2021-04-15
Supplement: pone.0249831.s009.pdf [file pone.0249831.s009.pdf]

**S8 Table. P-value of Khi-2 and Fisher exact tests for qualitative confounding factors**

| Author, year              | Qualitative confounding factor | Data extracted from included studies |                                           |                        | Results from this study                         |                    |                           | Status     |
|---------------------------|--------------------------------|--------------------------------------|-------------------------------------------|------------------------|-------------------------------------------------|--------------------|---------------------------|------------|
|                           |                                | Total number of LRTI +               | Number of LRTI + with confounding factors | Total number of LRTI - | Total number of LRTI - with confounding factors | P-value Khi-2 test | P-value Fisher exact test |            |
| Bertrand, 2015            | Atopy in parents               | 14                                   | 7                                         | 5                      | 2                                               | 1                  | 1                         | Symmetric  |
| Bertrand, 2015            | Male gender                    | 14                                   | 6                                         | 5                      | 3                                               | 0,891              | 0,628                     | Symmetric  |
| Fjaerli, 2005             | Current asthma                 | 35                                   | 12                                        | 64                     | 12                                              | 0,139              | 0,093                     | Symmetric  |
| Fjaerli, 2005             | Current atopy                  | 35                                   | 16                                        | 64                     | 33                                              | 0,729              | 0,675                     | Symmetric  |
| Fjaerli, 2005             | Current eczema                 | 35                                   | 14                                        | 64                     | 28                                              | 0,882              | 0,832                     | Symmetric  |
| Fjaerli, 2005             | Male gender                    | 35                                   | 20                                        | 64                     | 36                                              | 1                  | 1                         | Symmetric  |
| Fjaerli, 2005             | Parental smoking               | 35                                   | 19                                        | 64                     | 28                                              | 0,428              | 0,4                       | Symmetric  |
| Fjaerli, 2005             | Siblings in the house          | 35                                   | 11                                        | 64                     | 26                                              | 0,492              | 0,394                     | Symmetric  |
| García-García, 2007, HMPV | Allergic rhinitis              | 23                                   | 5                                         | 30                     | 5                                               | 0,91               | 0,73                      | Symmetric  |
| García-García, 2007, HMPV | Antiasthmatic treatment        | 23                                   | 7                                         | 30                     | 2                                               | 0,055              | 0,031                     | Asymmetric |
| García-García, 2007, HMPV | Asthma admissions              | 23                                   | 5                                         | 30                     | 0                                               | 0,027              | 0,012                     | Asymmetric |
| García-García, 2007, HMPV | Asthma in children             | 23                                   | 16                                        | 30                     | 4                                               | 0                  | 0                         | Asymmetric |
| García-García, 2007, HMPV | Asthma in father               | 23                                   | 3                                         | 30                     | 4                                               | 1                  | 1                         | Symmetric  |
| García-García, 2007, HMPV | Asthma in mother               | 23                                   | 6                                         | 30                     | 6                                               | 0,846              | 0,743                     | Symmetric  |
| García-García, 2007, HMPV | Asthma in siblings             | 23                                   | 8                                         | 30                     | 4                                               | 0,129              | 0,098                     | Symmetric  |
| García-García, 2007, HMPV | Atopic dermatitis              | 23                                   | 10                                        | 30                     | 11                                              | 0,827              | 0,778                     | Symmetric  |
| García-García, 2007, HMPV | Atopy in children              | 23                                   | 8                                         | 30                     | 6                                               | 0,371              | 0,346                     | Symmetric  |
| García-García, 2007, HMPV | Atopy in father                | 23                                   | 6                                         | 30                     | 5                                               | 0,62               | 0,501                     | Symmetric  |
| García-García, 2007, HMPV | Atopy in mother                | 23                                   | 7                                         | 30                     | 6                                               | 0,58               | 0,522                     | Symmetric  |
| García-García, 2007, HMPV | Atopy in siblings              | 23                                   | 6                                         | 30                     | 3                                               | 0,239              | 0,154                     | Symmetric  |
| García-García, 2007, HMPV | Current atopy                  | 23                                   | 1                                         | 30                     | 2                                               | 1                  | 1                         | Symmetric  |
| García-García, 2007, HMPV | Male gender                    | 23                                   | 14                                        | 30                     | 13                                              | 0,323              | 0,271                     | Symmetric  |
| García-García, 2007, HMPV | Maternal smoking               | 23                                   | 7                                         | 30                     | 12                                              | 0,667              | 0,569                     | Symmetric  |
| García-García, 2007, HMPV | Paternal smoking               | 23                                   | 8                                         | 30                     | 10                                              | 1                  | 1                         | Symmetric  |
| García-García, 2007, HMPV | Pets at home                   | 23                                   | 7                                         | 30                     | 13                                              | 0,5                | 0,4                       | Symmetric  |
| García-García, 2007, HMPV | Premature birth                | 23                                   | 9                                         | 30                     | 3                                               | 0,029              | 0,019                     | Asymmetric |
| García-García, 2007, HRSV | Allergic rhinitis              | 32                                   | 7                                         | 30                     | 5                                               | 0,844              | 0,751                     | Symmetric  |
| García-García, 2007, HRSV | Antiasthmatic treatment        | 32                                   | 10                                        | 30                     | 2                                               | 0,033              | 0,023                     | Asymmetric |
| García-García, 2007, HRSV | Asthma admissions              | 32                                   | 5                                         | 30                     | 0                                               | 0,073              | 0,053                     | Symmetric  |
| García-García, 2007, HRSV | Asthma in children             | 32                                   | 20                                        | 30                     | 4                                               | 0                  | 0                         | Asymmetric |
| García-García, 2007, HRSV | Asthma in father               | 32                                   | 5                                         | 30                     | 4                                               | 1                  | 1                         | Symmetric  |
| García-García, 2007, HRSV | Asthma in mother               | 32                                   | 6                                         | 30                     | 6                                               | 1                  | 1                         | Symmetric  |

|                               |                                   |     |    |      |      |       |       |            |
|-------------------------------|-----------------------------------|-----|----|------|------|-------|-------|------------|
| García-García, 2007, HRSV     | Asthma in siblings                | 32  | 5  | 30   | 4    | 1     | 1     | Symmetric  |
| García-García, 2007, HRSV     | Atopic dermatitis                 | 32  | 11 | 30   | 11   | 1     | 1     | Symmetric  |
| García-García, 2007, HRSV     | Atopy in children                 | 32  | 8  | 30   | 6    | 0,868 | 0,764 | Symmetric  |
| García-García, 2007, HRSV     | Atopy in father                   | 32  | 4  | 30   | 5    | 0,917 | 0,728 | Symmetric  |
| García-García, 2007, HRSV     | Atopy in mother                   | 32  | 13 | 30   | 6    | 0,138 | 0,102 | Symmetric  |
| García-García, 2007, HRSV     | Atopy in siblings                 | 32  | 11 | 30   | 3    | 0,047 | 0,033 | Asymmetric |
| García-García, 2007, HRSV     | Current atopy                     | 32  | 2  | 30   | 2    | 1     | 1     | Symmetric  |
| García-García, 2007, HRSV     | Male gender                       | 32  | 17 | 30   | 13   | 0,605 | 0,459 | Symmetric  |
| García-García, 2007, HRSV     | Maternal smoking                  | 32  | 21 | 30   | 12   | 0,077 | 0,074 | Symmetric  |
| García-García, 2007, HRSV     | Paternal smoking                  | 32  | 18 | 30   | 10   | 0,12  | 0,081 | Symmetric  |
| García-García, 2007, HRSV     | Pets at home                      | 32  | 8  | 30   | 13   | 0,209 | 0,18  | Symmetric  |
| García-García, 2007, HRSV     | Premature birth                   | 32  | 6  | 30   | 3    | 0,537 | 0,475 | Symmetric  |
| Henderson, 2005, 30–42 months | History of atopy                  | 48  | 7  | 6377 | 1319 | 0,389 | 0,372 | Symmetric  |
| Henderson, 2005, 30–42 months | Asthma in children                | 73  | 28 | 8039 | 1613 | 0     | 0     | Asymmetric |
| Henderson, 2005, 69–81 months | History of atopy                  | 48  | 7  | 6377 | 1319 | 0,389 | 0,372 | Symmetric  |
| Henderson, 2005, 69–81 months | Asthma in children                | 73  | 28 | 8039 | 1613 | 0     | 0     | Asymmetric |
| Juntti, 2003                  | Allergic rhinitis                 | 76  | 7  | 76   | 10   | 0,607 | 0,608 | Symmetric  |
| Juntti, 2003                  | History of asthma                 | 76  | 20 | 76   | 12   | 0,164 | 0,163 | Symmetric  |
| Juntti, 2003                  | History of eczema                 | 76  | 22 | 76   | 24   | 0,86  | 0,86  | Symmetric  |
| Juntti, 2003                  | Male gender                       | 76  | 47 | 76   | 47   | 1     | 1     | Symmetric  |
| Juntti, 2003                  | Maternal smoking during pregnancy | 76  | 8  | 76   | 14   | 0,249 | 0,249 | Symmetric  |
| Juntti, 2003                  | Pets at home                      | 76  | 31 | 76   | 41   | 0,144 | 0,143 | Symmetric  |
| Juntti, 2003                  | Smoke exposure                    | 76  | 32 | 76   | 25   | 0,315 | 0,315 | Symmetric  |
| Kristjánsson, 2006            | Family history of atopy           | 17  | 14 | 25   | 20   | 1     | 1     | Symmetric  |
| Kristjánsson, 2006            | Male gender                       | 17  | 9  | 27   | 25   | 0,007 | 0,007 | Asymmetric |
| Osundwa, 1993                 | Male gender                       | 70  | 42 | 70   | 45   | 0,727 | 0,728 | Symmetric  |
| Pooririsak, 2010              | Asthma in children                | 74  | 19 | 74   | 16   | 0,699 | 0,699 | Symmetric  |
| Pooririsak, 2010              | Atopic dermatitis                 | 74  | 30 | 74   | 27   | 0,735 | 0,736 | Symmetric  |
| Pooririsak, 2010              | Atopy in children                 | 74  | 6  | 74   | 14   | 0,092 | 0,091 | Symmetric  |
| Pullan, 1982                  | Antiasthmatic treatment           | 130 | 7  | 111  | 5    | 0,987 | 1     | Symmetric  |
| Pullan, 1982                  | Maternal smoking                  | 130 | 68 | 111  | 40   | 0,016 | 0,014 | Asymmetric |
| Pullan, 1982                  | Paternal smoking                  | 130 | 66 | 111  | 45   | 0,145 | 0,121 | Symmetric  |
| Sigurs, 1995, 1 year          | Asthma in parents                 | 47  | 0  | 93   | 3    | 0,531 | 0,551 | Symmetric  |
| Sigurs, 1995, 1 year          | Atopic dermatitis                 | 47  | 2  | 93   | 3    | 1     | 1     | Symmetric  |
| Sigurs, 1995, 1 year          | Atopy in parents                  | 47  | 9  | 93   | 18   | 1     | 1     | Symmetric  |
| Sigurs, 1995, 1 year          | Heredity for asthma               | 47  | 11 | 93   | 19   | 0,852 | 0,67  | Symmetric  |
| Sigurs, 1995, 1 year          | Heredity for atopy                | 47  | 18 | 93   | 34   | 0,987 | 0,855 | Symmetric  |
| Sigurs, 1995, 1 year          | History of pertussis              | 47  | 11 | 93   | 17   | 0,623 | 0,507 | Symmetric  |
| Sigurs, 1995, 1 year          | Male gender                       | 47  | 21 | 93   | 42   | 1     | 1     | Symmetric  |
| Sigurs, 1995, 1 year          | Pets at home                      | 47  | 12 | 93   | 36   | 0,173 | 0,135 | Symmetric  |

|                             |                      |    |    |     |    |       |       |            |
|-----------------------------|----------------------|----|----|-----|----|-------|-------|------------|
| Sigurs, 1995, 1 year        | Smoke exposure       | 47 | 21 | 93  | 42 | 1     | 1     | Symmetric  |
| Sigurs, 1995, 3 years       | Asthma in parents    | 47 | 0  | 93  | 3  | 0,531 | 0,551 | Symmetric  |
| Sigurs, 1995, 3 years       | Atopic dermatitis    | 47 | 2  | 93  | 3  | 1     | 1     | Symmetric  |
| Sigurs, 1995, 3 years       | Atopy in parents     | 47 | 9  | 93  | 18 | 1     | 1     | Symmetric  |
| Sigurs, 1995, 3 years       | Heredity for asthma  | 47 | 11 | 93  | 19 | 0,852 | 0,67  | Symmetric  |
| Sigurs, 1995, 3 years       | Heredity for atopy   | 47 | 18 | 93  | 34 | 0,987 | 0,855 | Symmetric  |
| Sigurs, 1995, 3 years       | History of pertussis | 47 | 11 | 93  | 17 | 0,623 | 0,507 | Symmetric  |
| Sigurs, 1995, 3 years       | Male gender          | 47 | 21 | 93  | 42 | 1     | 1     | Symmetric  |
| Sigurs, 1995, 3 years       | Pets at home         | 47 | 12 | 93  | 36 | 0,173 | 0,135 | Symmetric  |
| Sigurs, 1995, 3 years       | Smoke exposure       | 47 | 21 | 93  | 42 | 1     | 1     | Symmetric  |
| Sigurs, 2000                | Heredity for asthma  | 47 | 21 | 93  | 27 | 0,098 | 0,089 | Symmetric  |
| Sigurs, 2000                | Heredity for atopy   | 47 | 33 | 93  | 60 | 0,628 | 0,572 | Symmetric  |
| Sigurs, 2000                | Male gender          | 47 | 21 | 93  | 42 | 1     | 1     | Symmetric  |
| Sigurs, 2000                | Pets at home         | 47 | 22 | 93  | 52 | 0,401 | 0,371 | Symmetric  |
| Sigurs, 2000                | Smoke exposure       | 47 | 24 | 93  | 49 | 0,998 | 0,86  | Symmetric  |
| Sigurs, 2005                | Asthma in parents    | 47 | 17 | 93  | 25 | 0,349 | 0,329 | Symmetric  |
| Sigurs, 2005                | Atopy in parents     | 47 | 28 | 93  | 50 | 0,636 | 0,59  | Symmetric  |
| Sigurs, 2005                | Pets at home         | 47 | 29 | 93  | 68 | 0,235 | 0,179 | Symmetric  |
| Sigurs, 2005                | Smoke exposure       | 47 | 16 | 93  | 39 | 0,472 | 0,464 | Symmetric  |
| Sigurs, 2010                | Smoke exposure       | 45 | 19 | 92  | 40 | 1     | 1     | Symmetric  |
| Sigurs, 2010                | Asthma in parents    | 46 | 18 | 92  | 25 | 0,217 | 0,175 | Symmetric  |
| Sigurs, 2010                | Atopy in parents     | 46 | 30 | 92  | 52 | 0,426 | 0,362 | Symmetric  |
| Sigurs, 2010                | Pets at home         | 46 | 24 | 92  | 52 | 0,762 | 0,717 | Symmetric  |
| Sims, 1978                  | Male gender          | 35 | 17 | 35  | 17 | 1     | 1     | Symmetric  |
| Singleton, 2003             | Male gender          | 95 | 53 | 113 | 56 | 0,449 | 0,405 | Symmetric  |
| Singleton, 2003             | Premature birth      | 95 | 13 | 113 | 3  | 0,007 | 0,004 | Asymmetric |
| Singleton, 2003             | Smoke exposure       | 95 | 45 | 113 | 50 | 0,756 | 0,677 | Symmetric  |
| Sly, 1984                   | Atopy in children    | 20 | 6  | 20  | 11 | 0,201 | 0,2   | Symmetric  |
| Sly, 1984                   | Male gender          | 20 | 10 | 20  | 12 | 0,751 | 0,751 | Symmetric  |
| Sly, 1984                   | Smoke exposure       | 20 | 12 | 20  | 14 | 0,74  | 0,741 | Symmetric  |
| Stensballe, 2017, 1,5 years | Atopic dermatitis    | 39 | 2  | 23  | 2  | 0,986 | 0,623 | Symmetric  |
| Stensballe, 2017, 1,5 years | Atopy in parents     | 39 | 15 | 23  | 8  | 0,986 | 1     | Symmetric  |
| Stensballe, 2017, 1,5 years | Male gender          | 39 | 24 | 23  | 16 | 0,716 | 0,591 | Symmetric  |
| Stensballe, 2017, 1,5 years | Maternal smoking     | 39 | 26 | 23  | 14 | 0,852 | 0,784 | Symmetric  |
| Stensballe, 2017, 1,5 years | Premature birth      | 39 | 4  | 23  | 3  | 1     | 1     | Symmetric  |
| Stensballe, 2017, 5 years   | Atopic dermatitis    | 39 | 2  | 23  | 2  | 0,986 | 0,623 | Symmetric  |
| Stensballe, 2017, 5 years   | Atopy in parents     | 39 | 15 | 23  | 8  | 0,986 | 1     | Symmetric  |
| Stensballe, 2017, 5 years   | Male gender          | 39 | 24 | 23  | 16 | 0,716 | 0,591 | Symmetric  |
| Stensballe, 2017, 5 years   | Maternal smoking     | 39 | 26 | 23  | 14 | 0,852 | 0,784 | Symmetric  |
| Stensballe, 2017, 5 years   | Premature birth      | 39 | 4  | 23  | 3  | 1     | 1     | Symmetric  |

|                      |                                   |     |     |     |     |       |       |            |
|----------------------|-----------------------------------|-----|-----|-----|-----|-------|-------|------------|
| Zomer-Kooijker, 2014 | Smoke exposure                    | 159 | 42  | 451 | 126 | 0,79  | 0,757 | Symmetric  |
| Zomer-Kooijker, 2014 | Atopy in mother                   | 154 | 66  | 466 | 224 | 0,303 | 0,266 | Symmetric  |
| Zomer-Kooijker, 2014 | Maternal high educational level   | 153 | 53  | 470 | 301 | 0     | 0     | Asymmetric |
| Zomer-Kooijker, 2014 | Pets at home                      | 154 | 79  | 475 | 274 | 0,196 | 0,191 | Symmetric  |
| Zomer-Kooijker, 2014 | Breastfeeding                     | 155 | 97  | 515 | 376 | 0,016 | 0,016 | Asymmetric |
| Zomer-Kooijker, 2014 | Day care attendance               | 155 | 52  | 515 | 227 | 0,025 | 0,02  | Asymmetric |
| Zomer-Kooijker, 2014 | Maternal smoking during pregnancy | 155 | 27  | 548 | 26  | 0     | 0     | Asymmetric |
| Zomer-Kooijker, 2014 | Siblings in the house             | 155 | 134 | 548 | 297 | 0     | 0     | Asymmetric |
| Zomer-Kooijker, 2014 | Male gender                       | 159 | 87  | 549 | 265 | 0,18  | 0,177 | Symmetric  |
