# Supplementary material for: Association between early viral LRTI and subsequent wheezing development, a meta-analysis and sensitivity analyses for studies comparable for confounding factors
Source: PubMed Central journal article supplement (PMC8049235; doi:10.1371/journal.pone.0249831), 2021-04-15
Supplement: pone.0249831.s010.pdf [file pone.0249831.s010.pdf]

**S8 Table. P-value of Student test for quantitative confounding factors**

| Author, year                | Quantitative confounding factors | Data extracted from included studies |                 |               |                        |                 |               | Results from this study                        |            |
|-----------------------------|----------------------------------|--------------------------------------|-----------------|---------------|------------------------|-----------------|---------------|------------------------------------------------|------------|
|                             |                                  | Total number of LRTI +               | Mean for LRTI + | SD for LRTI + | Total number of LRTI - | Mean for LRTI - | SD for LRTI - | P-Value for Student Test with Unequal Variance | Status     |
| García-García, 2007, HMPV   | Age at interview (Years)         | 23                                   | 3,70            | 0,92          | 30                     | 3,90            | 0,61          | 0,187                                          | Symmetric  |
| García-García, 2007, HRSV   | Age at interview (Years)         | 32                                   | 4,03            | 0,65          | 30                     | 3,90            | 0,61          | 0,21                                           | Symmetric  |
| Sims, 1978                  | Age at interview (Years)         | 35                                   | 8,32            | 0,28          | 35                     | 8,40            | 0,33          | 0,139                                          | Symmetric  |
| Sly, 1984                   | Age at interview (Years)         | 20                                   | 16,10           | 5,70          | 20                     | 12,70           | 3,20          | 0,013                                          | Asymmetric |
| Zomer-Kooijker, 2014        | Age at interview (Years)         | 159                                  | 5,93            | 0,55          | 549                    | 6,08            | 1,92          | 0,049                                          | Asymmetric |
| Osundwa, 1993               | Age at recruitment (months)      | 70                                   | 3,80            | 3,00          | 70                     | 4,00            | 3,00          | 0,347                                          | Symmetric  |
| Sly, 1984                   | Age at recruitment (months)      | 20                                   | 3,20            | 2,30          | 20                     | 5,70            | 3,40          | 0,005                                          | Asymmetric |
| Stensballe, 2017, 1,5 years | Age at recruitment (months)      | 39                                   | 0,68            | 0,56          | 23                     | 0,84            | 0,62          | 0,164                                          | Symmetric  |
| Stensballe, 2017, 5 years   | Age at recruitment (months)      | 39                                   | 0,68            | 0,56          | 23                     | 0,84            | 0,62          | 0,164                                          | Symmetric  |
| Sigurs, 1995, 3 years       | Birth weight (grams)             | 47                                   | 3314,00         | 556,00        | 93                     | 3520,00         | 657,00        | 0,027                                          | Asymmetric |
| Sigurs, 1995, 1 year        | Birth weight (grams)             | 47                                   | 3314,00         | 556,00        | 93                     | 3520,00         | 657,00        | 0,027                                          | Asymmetric |
| Sims, 1978                  | Birth weight (grams)             | 35                                   | 3220,00         | 490,00        | 35                     | 3320,00         | 460,00        | 0,191                                          | Symmetric  |
| Stensballe, 2017, 1,5 years | Birth weight (grams)             | 39                                   | 3420,00         | 507,90        | 23                     | 3486,67         | 474,10        | 0,302                                          | Symmetric  |
| Stensballe, 2017, 5 years   | Birth weight (grams)             | 39                                   | 3420,00         | 507,90        | 23                     | 3486,67         | 474,10        | 0,302                                          | Symmetric  |
| Sigurs, 1995, 3 years       | Breastfeeding period (months)    | 47                                   | 4,20            | 3,30          | 93                     | 4,80            | 3,40          | 0,159                                          | Symmetric  |
| Sigurs, 1995, 1 year        | Breastfeeding period (months)    | 47                                   | 4,20            | 3,30          | 93                     | 4,80            | 3,40          | 0,159                                          | Symmetric  |
| Sigurs, 1995, 3 years       | Gestational age (weeks)          | 47                                   | 38,90           | 2,00          | 93                     | 39,80           | 1,60          | 0,004                                          | Asymmetric |
| Sigurs, 1995, 1 year        | Gestational age (weeks)          | 47                                   | 38,90           | 2,00          | 93                     | 39,80           | 1,60          | 0,004                                          | Asymmetric |
| Sigurs, 2000                | Height at interview (cm)         | 47                                   | 126,00          | 6,58          | 93                     | 127,00          | 5,22          | 0,183                                          | Symmetric  |
| Sigurs, 1995, 3 years       | Height at interview (cm)         | 47                                   | 97,20           | 4,00          | 93                     | 96,80           | 4,00          | 0,289                                          | Symmetric  |
| Sigurs, 2010                | Height at interview (cm)         | 46                                   | 174,00          | 10,00         | 92                     | 174,00          | 10,00         | 0,5                                            | Symmetric  |
| Sigurs, 2005                | Height at interview (cm)         | 47                                   | 160,30          | 8,80          | 93                     | 162,30          | 8,30          | 0,1                                            | Symmetric  |
| Sigurs, 1995, 1 year        | Height at interview (cm)         | 47                                   | 97,20           | 4,00          | 93                     | 96,80           | 4,00          | 0,289                                          | Symmetric  |
| Sims, 1978                  | Height at interview (cm)         | 35                                   | 127,90          | 63,90         | 35                     | 126,40          | 5,25          | 0,445                                          | Symmetric  |
| Zomer-Kooijker, 2014        | Height at interview (cm)         | 159                                  | 118,80          | 9,90          | 549                    | 118,10          | 5,57          | 0,197                                          | Symmetric  |
| Sims, 1978                  | Mean age of siblings (Years)     | 35                                   | 10,90           | 5,13          | 35                     | 8,50            | 4,17          | 0,018                                          | Asymmetric |
| Sigurs, 2000                | Number of siblings               | 47                                   | 1,80            | 0,97          | 93                     | 1,78            | 1,10          | 0,456                                          | Symmetric  |
| Sigurs, 1995, 3 years       | Number of siblings               | 47                                   | 1,30            | 0,90          | 93                     | 1,10            | 1,00          | 0,117                                          | Symmetric  |
| Sigurs, 2005                | Number of siblings               | 47                                   | 2,00            | 0,95          | 93                     | 1,80            | 0,99          | 0,125                                          | Symmetric  |
| Sigurs, 1995, 1 year        | Number of siblings               | 47                                   | 1,30            | 0,90          | 93                     | 1,10            | 1,00          | 0,117                                          | Symmetric  |
| Sims, 1978                  | Number of siblings               | 35                                   | 2,10            | 1,45          | 35                     | 1,30            | 0,86          | 0,003                                          | Asymmetric |
| Sigurs, 2000                | Weight at interview (Kg)         | 47                                   | 27,00           | 4,63          | 93                     | 27,10           | 4,21          | 0,451                                          | Symmetric  |
| Sigurs, 1995, 3 years       | Weight at interview (Kg)         | 47                                   | 15,60           | 1,80          | 93                     | 15,40           | 1,80          | 0,268                                          | Symmetric  |
| Sigurs, 2010                | Weight at interview (Kg)         | 46                                   | 65,00           | 12,00         | 92                     | 70,00           | 13,00         | 0,014                                          | Asymmetric |
| Sigurs, 2005                | Weight at interview (Kg)         | 47                                   | 52,20           | 10,60         | 93                     | 52,90           | 11,20         | 0,359                                          | Symmetric  |
| Sigurs, 1995, 1 year        | Weight at interview (Kg)         | 47                                   | 15,60           | 1,80          | 93                     | 15,40           | 1,80          | 0,268                                          | Symmetric  |
| Sims, 1978                  | Weight at interview (Kg)         | 35                                   | 26,58           | 4,00          | 35                     | 26,20           | 3,95          | 0,345                                          | Symmetric  |

|                      |                          |     |       |      |     |       |      |       |           |
|----------------------|--------------------------|-----|-------|------|-----|-------|------|-------|-----------|
| Zomer-Kooijker, 2014 | Weight at interview (Kg) | 159 | 21,60 | 4,77 | 549 | 21,77 | 3,20 | 0,339 | Symmetric |
|----------------------|--------------------------|-----|-------|------|-----|-------|------|-------|-----------|
