# Supplementary material for: Association between early viral LRTI and subsequent wheezing development, a meta-analysis and sensitivity analyses for studies comparable for confounding factors
Source: PubMed Central journal article supplement (PMC8049235; doi:10.1371/journal.pone.0249831), 2021-04-15
Supplement: pone.0249831.s011.pdf [file pone.0249831.s011.pdf]

S10 Table. Subgroup analyses of wheezing in children with LRTI in infancy and control without respiratory diseases.

|                                      | OR (95%CI)     | 95% Prediction interval | N Studies | N LRTI cases | N controls | H (95%CI)     | I <sup>2</sup> (95%CI) | P heterogeneity | P-value Egger test | P-value subgroup difference |
|--------------------------------------|----------------|-------------------------|-----------|--------------|------------|---------------|------------------------|-----------------|--------------------|-----------------------------|
| <b>Sampling</b>                      |                |                         |           |              |            |               |                        |                 |                    | 0.505                       |
| Non probabilistic                    | 3.1 [2.4-4]    | [1.4-6.9]               | 21        | 1222         | 18624      | 1.4 [1.1-1.8] | 49.4 [16.3-69.5]       | 0.006           | 0.232              |                             |
| Probabilistic                        | 2 [0.6-7.1]    | NA                      | 1         | 17           | 25         | NA            | NA                     | 1               | NA                 |                             |
| <b>Timing of exposure collection</b> |                |                         |           |              |            |               |                        |                 |                    | 0.99                        |
| Prospectively                        | 3 [2.4-3.9]    | [1.7-5.5]               | 18        | 1019         | 18382      | 1.3 [1-1.7]   | 40 [0-65.8]            | 0.041           | 0.552              |                             |
| Retrospectively                      | 3.1 [1.5-6.1]  | [0.2-46.8]              | 4         | 220          | 267        | 1.9 [1.1-3.2] | 72.6 [22.6-90.3]       | 0.012           | 0.387              |                             |
| <b>UNSD Region</b>                   |                |                         |           |              |            |               |                        |                 |                    | 0.023                       |
| Eastern Europe                       | 1.3 [0.8-2.3]  | NA                      | 1         | 95           | 113        | NA            | NA                     | 1               | NA                 |                             |
| Northern Europe                      | 3.1 [2.3-4.1]  | [1.5-6.3]               | 15        | 830          | 17865      | 1.3 [1-1.8]   | 43 [0-69]              | 0.039           | 0.249              |                             |
| Oceania                              | 2.8 [0.8-10]   | NA                      | 1         | 20           | 20         | NA            | NA                     | 1               | NA                 |                             |
| South America                        | 0.6 [0.1-5.1]  | NA                      | 1         | 14           | 5          | NA            | NA                     | 1               | NA                 |                             |
| Southern Europe                      | 6 [2.6-14.3]   | NA                      | 2         | 55           | 60         | 1             | 0                      | 0.38            | NA                 |                             |
| Western Asia                         | 5.4 [2.3-12.5] | NA                      | 1         | 70           | 70         | NA            | NA                     | 1               | NA                 |                             |
| Western Europe                       | 3.1 [1.9-5]    | NA                      | 1         | 155          | 516        | NA            | NA                     | 1               | NA                 |                             |
| <b>Age range at recruitment</b>      |                |                         |           |              |            |               |                        |                 |                    | 0.113                       |
| < 6 months                           | 2.8 [2.1-3.9]  | [1.7-4.8]               | 5         | 369          | 765        | 1 [1-1]       | 0 [0-2.6]              | 0.931           | 0.161              |                             |
| < 1 year                             | 3.3 [2.4-4.6]  | [1.3-8.5]               | 13        | 668          | 17695      | 1.4 [1-2]     | 51.8 [9.2-74.4]        | 0.015           | 0.546              |                             |
| < 2 years                            | 1.8 [1.1-2.9]  | [0.1-53.6]              | 3         | 167          | 154        | 1.3 [1-2.4]   | 40.8 [0-81.9]          | 0.185           | 0.292              |                             |
| <b>Age range at interview</b>        |                |                         |           |              |            |               |                        |                 |                    | 0.053                       |
| 2-5 years                            | 4.1 [3-5.6]    | [2.9-5.9]               | 9         | 403          | 10168      | 1 [1-1.3]     | 0 [0-38.1]             | 0.804           | 0.617              |                             |
| 5-10 years                           | 2.3 [1.5-3.6]  | [0.8-7.3]               | 8         | 579          | 8160       | 1.7 [1.2-2.5] | 64.8 [24.9-83.5]       | 0.006           | 0.472              |                             |
| 10-15 years                          | 2.2 [1-5.1]    | NA                      | 1         | 47           | 93         | NA            | NA                     | 1               | NA                 |                             |
| 15-20 years                          | 6.8 [2.6-17.2] | NA                      | 1         | 46           | 92         | NA            | NA                     | 1               | NA                 |                             |

|                                   | <b>OR (95%CI)</b> | <b>95% Prediction interval</b> | <b>N Studies</b> | <b>N LRTI cases</b> | <b>N controls</b> | <b>H (95%CI)</b> | <b>I<sup>2</sup> (95%CI)</b> | <b>P heterogeneity</b> | <b>P-value Egger test</b> | <b>P-value subgroup difference</b> |
|-----------------------------------|-------------------|--------------------------------|------------------|---------------------|-------------------|------------------|------------------------------|------------------------|---------------------------|------------------------------------|
| <b>Hospitalization LRTI -</b>     |                   |                                |                  |                     |                   |                  |                              |                        |                           | 0.478                              |
| Ambulatory                        | 2.9 [2.1-4.1]     | [1.2-6.9]                      | 8                | 656                 | 17954             | 1.4 [1-2.1]      | 50.4 [0-77.8]                | 0.049                  | 0.616                     |                                    |
| Hospitalized                      | 4.2 [2.7-6.5]     | [2.3-7.4]                      | 7                | 234                 | 216               | 1 [1-1.5]        | 0 [0-54.2]                   | 0.701                  | 0.249                     |                                    |
| Hospitalized/ambulatory           | 3.3 [1.9-5.6]     | NA                             | 2                | 94                  | 186               | 1                | 0                            | 0.812                  | NA                        |                                    |
| <b>Virus screened for LRTI +</b>  |                   |                                |                  |                     |                   |                  |                              |                        |                           | 0.249                              |
| Adenovirus type 7                 | 2.8 [0.8-10]      | NA                             | 1                | 20                  | 20                | NA               | NA                           | 1                      | NA                        |                                    |
| Human Metapneumovirus (hMPV)      | 10 [2.4-41.2]     | NA                             | 1                | 23                  | 30                | NA               | NA                           | 1                      | NA                        |                                    |
| Human Respiratory Syncytial Virus | 3 [2.3-3.8]       | [1.3-6.5]                      | 20               | 1196                | 18599             | 1.4 [1.1-1.8]    | 48.5 [13.6-69.4]             | 0.008                  | 0.343                     |                                    |
| <b>Type of LRTI</b>               |                   |                                |                  |                     |                   |                  |                              |                        |                           | 0.007                              |
| Bronchiolitis                     | 3.8 [3-4.7]       | [2.9-4.8]                      | 15               | 772                 | 18214             | 1.2 [1-1.6]      | 26.9 [0-60.6]                | 0.159                  | 0.705                     |                                    |
| LRTI not specified                | 1.9 [1.4-2.7]     | [0.9-4.1]                      | 6                | 447                 | 415               | 1.2 [1-1.9]      | 34 [0-73.5]                  | 0.181                  | 0.442                     |                                    |
| Pneumonia                         | 2.8 [0.8-10]      | NA                             | 1                | 20                  | 20                | NA               | NA                           | 1                      | NA                        |                                    |
| <b>Type of wheezing</b>           |                   |                                |                  |                     |                   |                  |                              |                        |                           | 0.996                              |
| Any wheezing                      | 3.3 [1.9-5.6]     | NA                             | 2                | 94                  | 186               | 1                | 0                            | 0.812                  | NA                        |                                    |
| Current wheezing                  | 3.1 [1.6-6.3]     | [0.4-22.8]                     | 6                | 359                 | 17164             | 1.9 [1.3-2.9]    | 72.3 [36-88]                 | 0.003                  | 0.389                     |                                    |
| Recurrent wheezing                | 3 [2.2-4.2]       | [1.3-7.2]                      | 13               | 631                 | 783               | 1.3 [1-1.8]      | 44 [0-70.7]                  | 0.045                  | 0.678                     |                                    |
| Wheezing in the last 12 months    | 3.1 [1.9-5]       | NA                             | 1                | 155                 | 516               | NA               | NA                           | 1                      | NA                        |                                    |
